# Supplementary material for: Changes in Indian Summer Monsoon Using Neodymium (Nd) Isotopes in the Andaman Sea During the Last 24,000 years
Source: Springer Nature journal article supplement (doi:10.1007/s41748-019-00105-0), 2019-06-27
Supplement: MOESM1 [file 41748_2019_105_MOESM1_ESM.docx]

**Changes in Indian summer monsoon using** **neodymium (Nd) isotopes in the Andaman Sea during the last 24,000 years**

Harunur Rashid1, 2, Alexandra T. Gourlan3, Brittany Marche2, Kaylyn Sheppard2,and Nabil Khélifi4

1College of Marine Sciences, Shanghai Ocean University, Shanghai, China;

2Earth and Environmental Sciences, Memorial University of Newfoundland, 20 University Drive, Corner Brook, NL, Canada; (+1) 902-441-8229; (+1) 902-426-4104;

3ISTerre, Université Joseph Fourier, 1381 Rue de la Piscine, BP 53 38041 Grenoble Cedex 09, France

4GEOMAR Helmholtz Centre for Ocean Research Kiel, Wischhofstrasse 1-3, 24148 Kiel, Germany

Table 3: Nd isotope ratios expressed as εNd of the Andaman Sea sediment core RC12-344.

| Age (ka) | εNd ± 2σ seawater |
| --- | --- |
| 1.57 | -10.18±0.17 |
| 1.57 | -10.12±0.17 |
| 1.57 | -9.96±0.17 |
| 1.57 | -10.00±0.17 |
| 2.70 | -10.28±0.17 |
| 2.70 | -10.54±0.17 |
| 2.70 | -10.48±0.17 |
| 3.23 | -10.22±0.17 |
| 3.23 | -10.09±0.17 |
| 4.21 | -10.26±0.17 |
| 4.21 | -10.33±0.17 |
| 5.34 | -9.95±0.17 |
| 7.24 | -10.21±0.17 |
| 7.81 | -9.74±0.17 |
| 8.11 | -9.83±0.22 |
| 8.11 | -10.01±0.22 |
| 8.42 | -9.57±0.17 |
| 8.42 | -9.13±0.17 |
| 8.82 | -9.52±0.17 |
| 9.10 | -8.99±0.17 |
| 9.84 | -9.14±0.22 |
| 9.84 | -9.06±0.22 |
| 10.22 | -8.91±0.22 |
| 10.79 | -8.88±0.17 |
| 11.51 | -9.17±0.17 |
| 12.14 | -8.85±0.17 |
| 12.24 | -8.94±0.22 |
| 12.24 | -8.96±0.22 |
| 12.91 | -9.04±0.17 |
| 13.22 | -9.30±0.22 |
| 13.22 | -9.33±0.22 |
| 13.84 | -9.28±0.17 |
| 14.62 | -9.01±0.17 |
| 14.62 | -9.06±0.17 |
| 14.89 | -8.94±0.17 |
| 15.20 | -9.35±0.22 |
| 15.70 | -9.14±0.22 |
| 16.70 | -9.10±0.22 |
| 17.31 | -8.98±0.22 |
| 17.80 | -9.06±0.22 |
| 18.00 | -9.25±0.22 |
| 18.21 | -9.38±0.22 |
| 18.55 | -9.17±0.22 |
| 18.90 | -9.24±0.22 |
| 19.24 | -9.36±0.22 |
| 19.52 | -9.51±0.22 |
| 20.20 | -9.50±0.22 |
| 20.88 | -9.66±0.22 |
| 21.22 | -9.87±0.22 |
| 21.56 | -9.70±0.22 |
| 21.90 | -9.55±0.22 |
| 22.65 | -9.75±0.22 |
| 22.99 | -9.98±0.22 |
| 22.99 | -9.84±0.22 |
| | 23.26 | | --- | | -9.68±0.22 |
| | 23.47 | | --- | | -9.87±0.22 |
